# Supplementary material for: Facile synthesis of PdNi nanowire networks supported on reduced graphene oxide with enhanced catalytic performance for formic acid oxidation
Source: Royal Society of Chemistry journal article supplement (doi:10.1039/c5ta02829a), 2015-01-01
Supplement: c5ta02829a1.pdf [file c5ta02829a1.pdf]

## Electronic Supplementary Information

### Facile synthesis of PdNi nanowire networks supported on reduced graphene oxide with enhanced catalytic performance for formic acid oxidation

Duan Bin, Beibei Yang, Fangfang Ren, Ke Zhang, Ping Yang and Yukou Du\*

College of Chemistry, Chemical Engineering and Materials Science, Soochow University, Suzhou 215123, P. R. China. E-mail: [duyk@suda.edu.cn](mailto:duyk@suda.edu.cn)

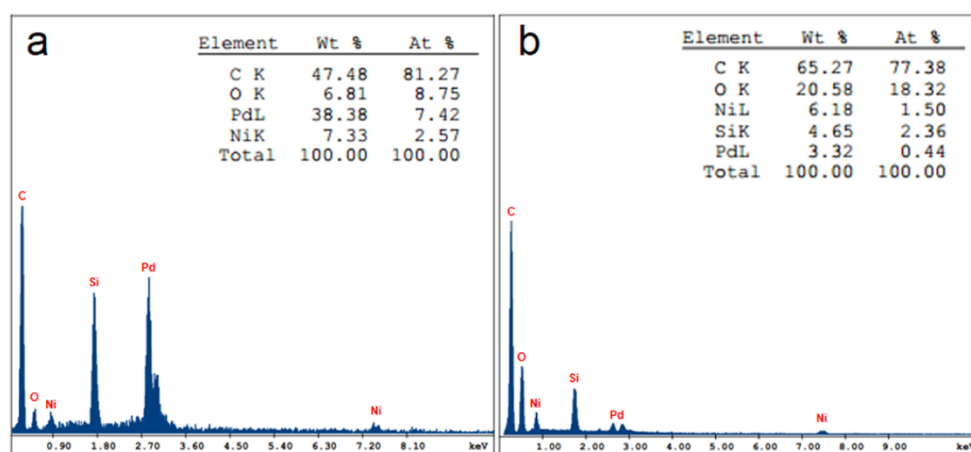

Fig. S1 EDX spectrum of the Pd<sub>3</sub>Ni<sub>1</sub>-NNs/RGO (a) and Pd<sub>1</sub>Ni<sub>3</sub>-NNs/RGO (b) composites

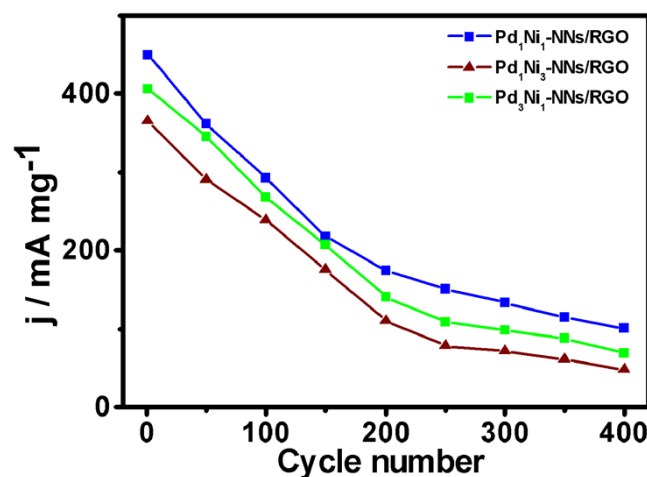

Fig. S2 The peak current of the forward scan on Pd<sub>1</sub>Ni<sub>1</sub>-NNs/RGO, Pd<sub>3</sub>Ni<sub>1</sub>-NNs/RGO and Pd<sub>1</sub>Ni<sub>3</sub>-NNs/RGO vs. the CV cycle number in 0.5 M H<sub>2</sub>SO<sub>4</sub> and 0.5 M HCOOH solution
